# Supplementary material for: Azacytidine induces necrosis of multiple myeloma cells through oxidative stress
Source: PubMed Central journal article supplement (PMC3718702; doi:10.1186/1477-5956-11-24), 2013-06-13
Supplement: 1477-5956-11-24-S2.pdf [file 1477-5956-11-24-S2.pdf]

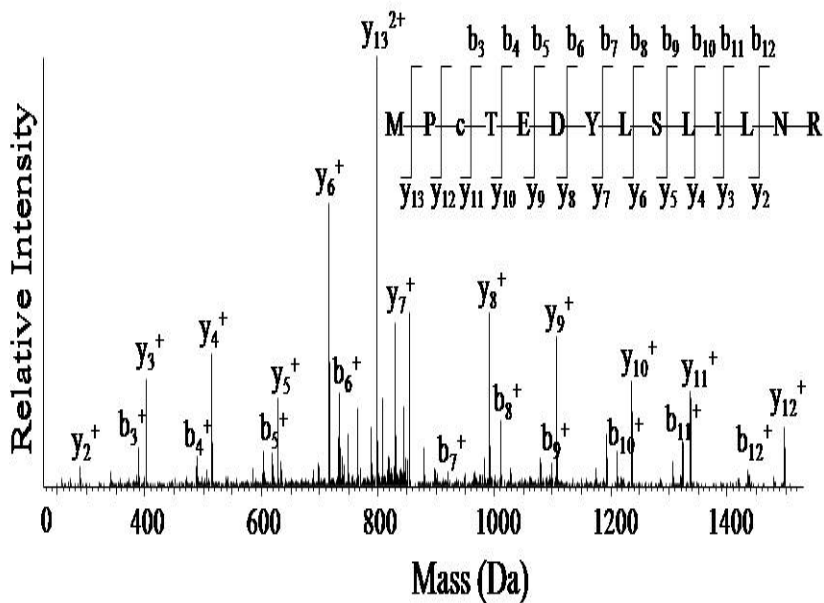

Supplementary Figures 1. The MS/MS spectrum of a doubly charged peptide ion at  $m/z$  863 for  $MH_2^{2+}$  corresponding to the mass of the peptide (MPCTEDYLSLILNR) from Bovine serum albumin, with four amino acids difference from human serum albumin.
