# Supplementary material for: Azacytidine induces necrosis of multiple myeloma cells through oxidative stress
Source: PubMed Central journal article supplement (PMC3718702; doi:10.1186/1477-5956-11-24), 2013-06-13

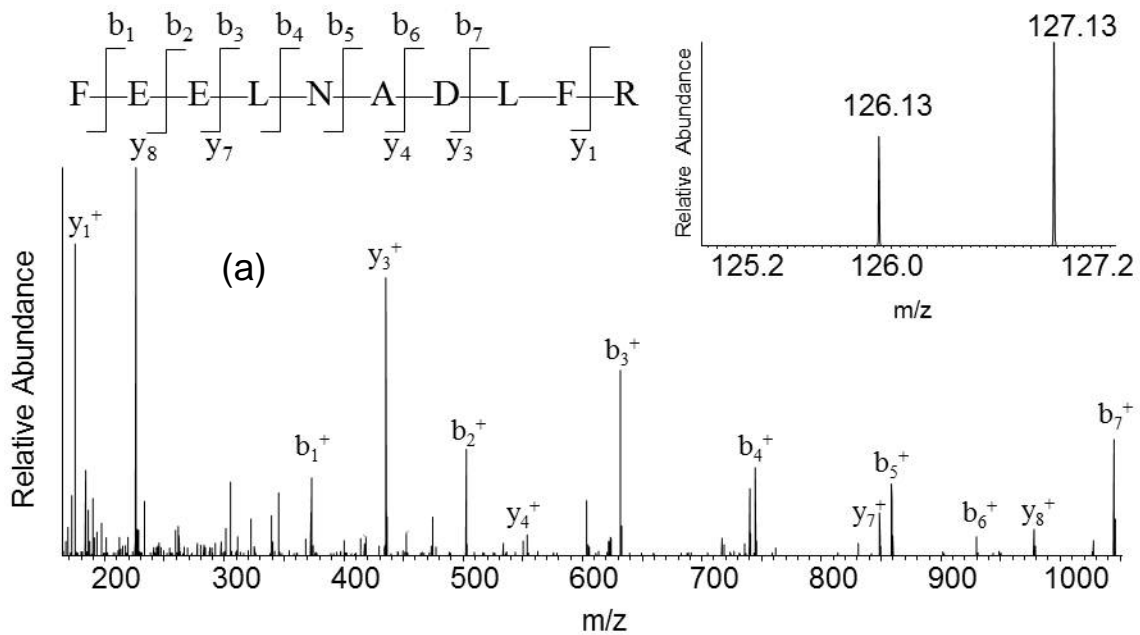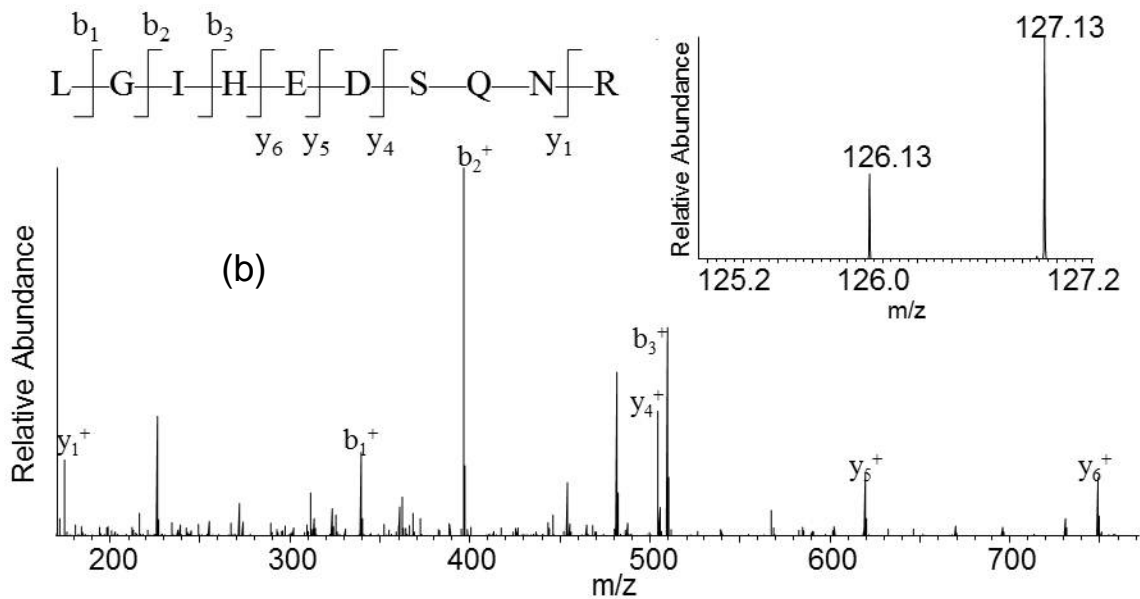

Supplement: 1477-5956-11-24-S8.pdf [file 1477-5956-11-24-S8.pdf]
