# Supplementary material for: Azacytidine induces necrosis of multiple myeloma cells through oxidative stress
Source: Springer Nature journal article supplement (doi:10.1186/1477-5956-11-24), 2013-06-13
Supplement: 12953_2012_438_MOESM3_ESM.pdf [file 12953_2012_438_MOESM3_ESM.pdf]

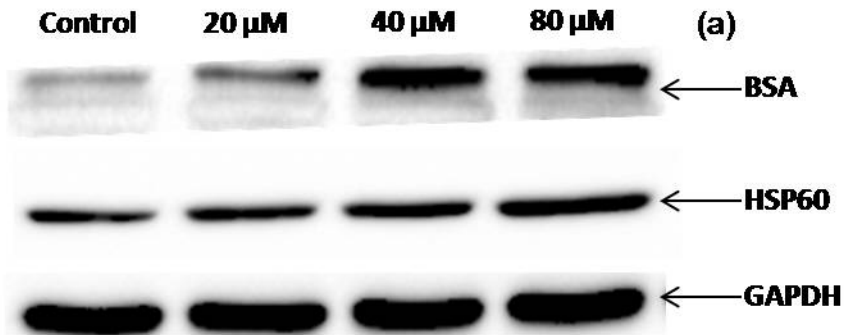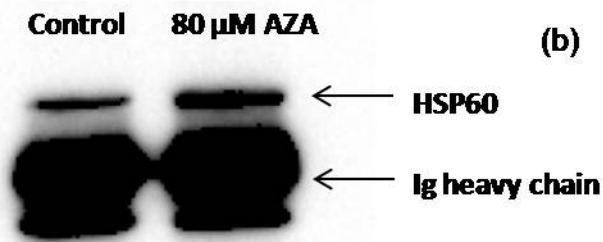

Supplementary Figure 2. Western blot analysis of BSA and HSP60 in azacytidine treated cells. (a) Western blot analysis of HSP60 and BSA from untreated and U266 cells treated with 20  $\mu\text{M}$ , 40  $\mu\text{M}$ , and 80  $\mu\text{M}$  azacytidine for 24 h. Lane 1, before treatment; Lane 2, 20  $\mu\text{M}$ ; Lane 3, 40  $\mu\text{M}$ ; and Lane 4, and 80  $\mu\text{M}$ . (b) Western blot analysis of HSP60 after anti-BSA antibody-immunoprecipitation.
