# Supplementary material for: Azacytidine induces necrosis of multiple myeloma cells through oxidative stress
Source: Springer Nature journal article supplement (doi:10.1186/1477-5956-11-24), 2013-06-13
Supplement: 12953_2012_438_MOESM4_ESM.pdf [file 12953_2012_438_MOESM4_ESM.pdf]

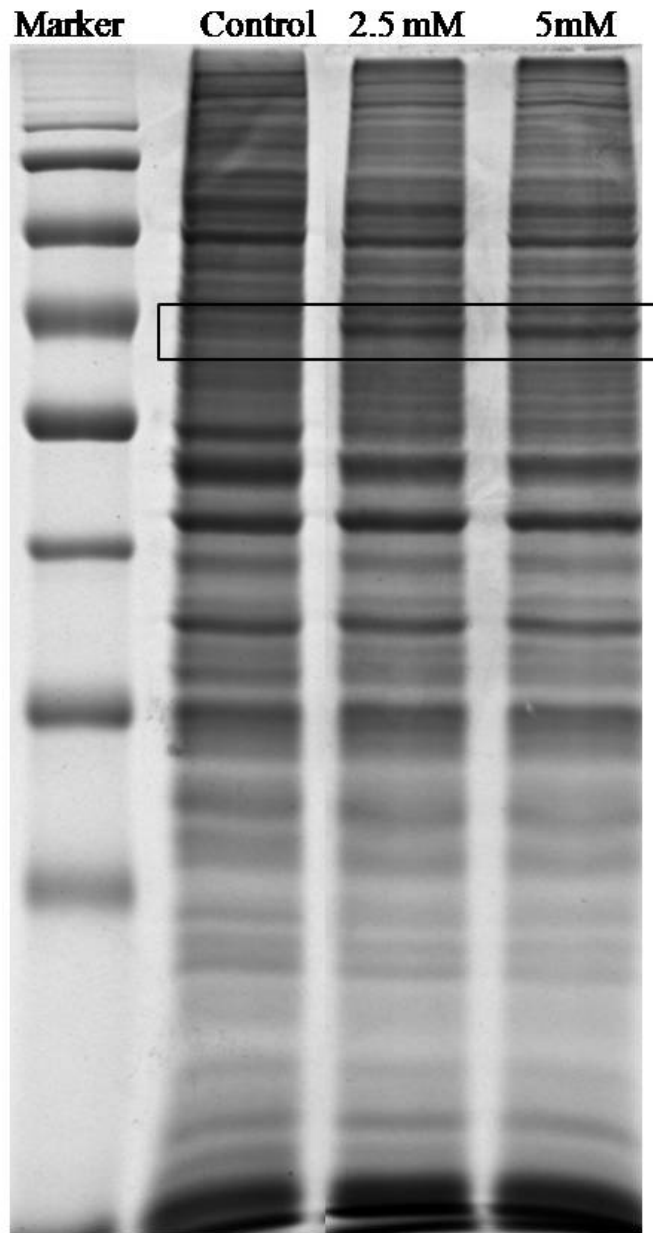

Supplementary Figures 3. The 1D SDS-PAGE gel image of proteins from untreated and H<sub>2</sub>O<sub>2</sub>-treated U266 cells. Lane 1, molecular weight markers; Lane 2, proteins from untreated cells; Lane 3, proteins from 2.5 mM H<sub>2</sub>O<sub>2</sub>-treated U266 cells; Lane 4, proteins from 5 mM H<sub>2</sub>O<sub>2</sub>-treated cells. The band with differentially expressed proteins was marked with a square.
